# Supplementary material
Source: HighWire-hosted journal article supplement (https://erj.ersjournals.com/content/59/6/2102024)

## Online supplement

Hoeper et al.:

Temporal trends in pulmonary arterial hypertension:  
Results from the COMPERA registry

Figure S1: Selected baseline variables per year of PAH diagnosis

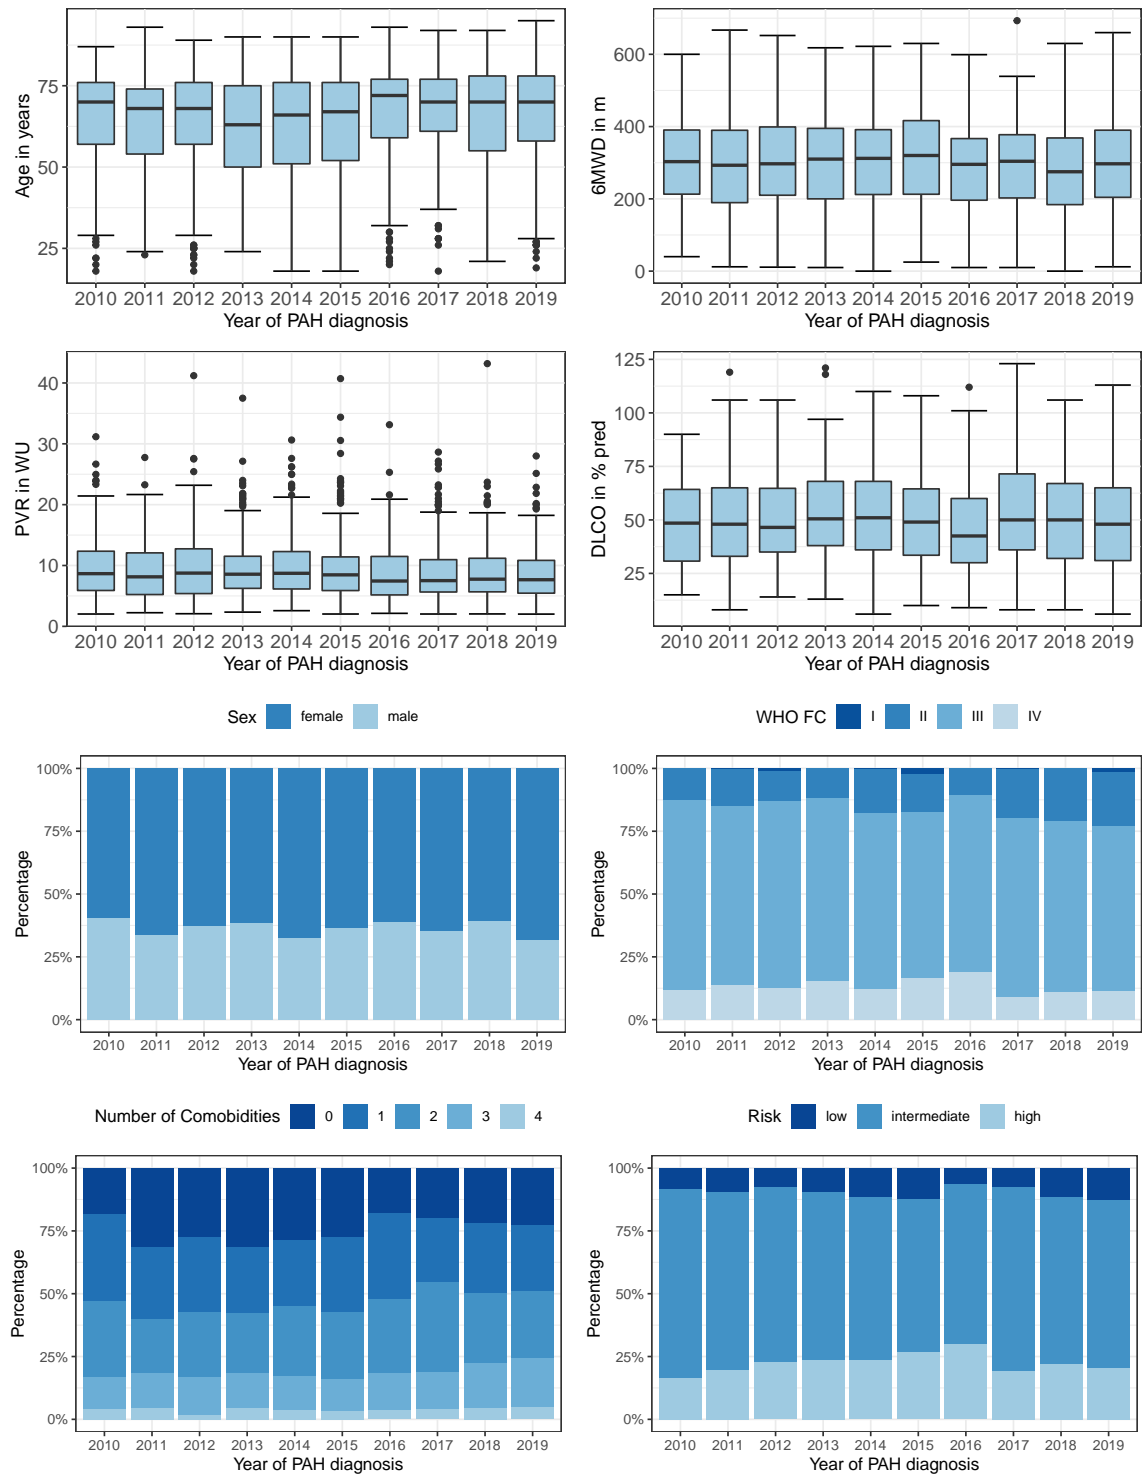

Figure S2a: Kaplan-Meier survival estimates in PAH for patients &lt;65 years at baseline

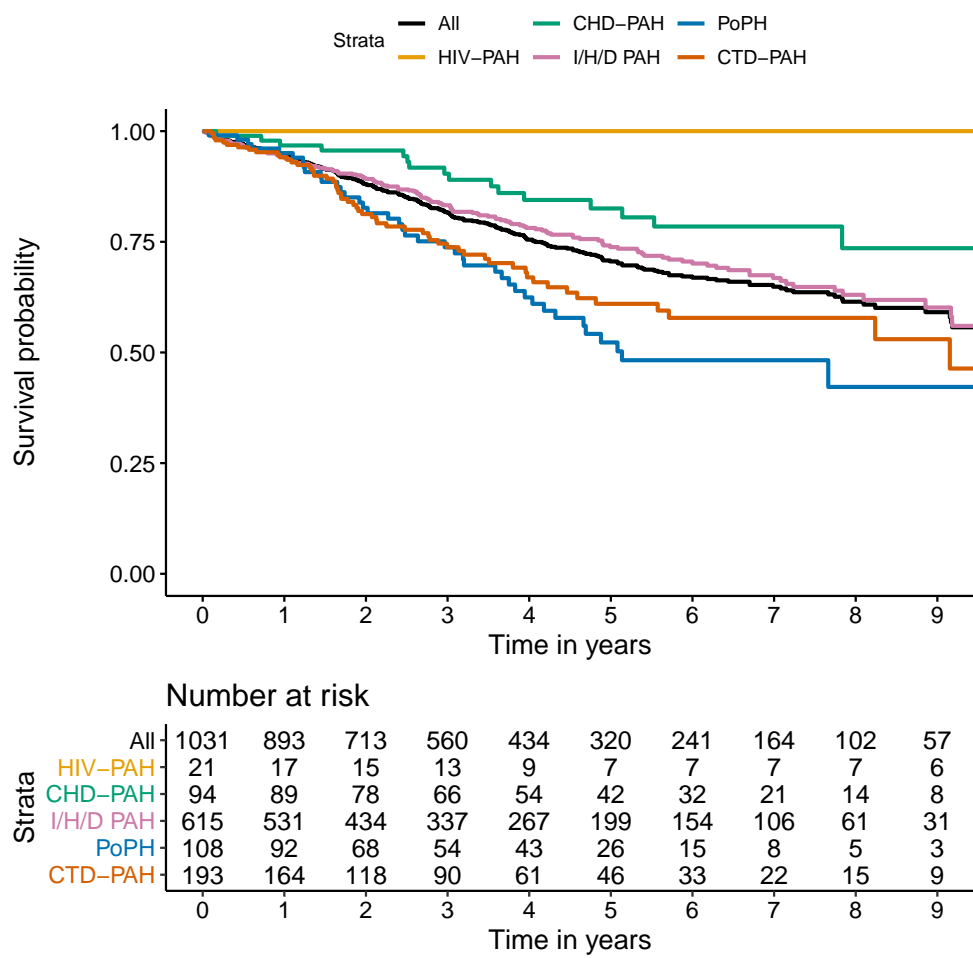

Figure S2b: Kaplan-Meier survival estimates in PAH for patients  $\geq 65$  years at baseline, HIV-PAH patients (n=3) omitted

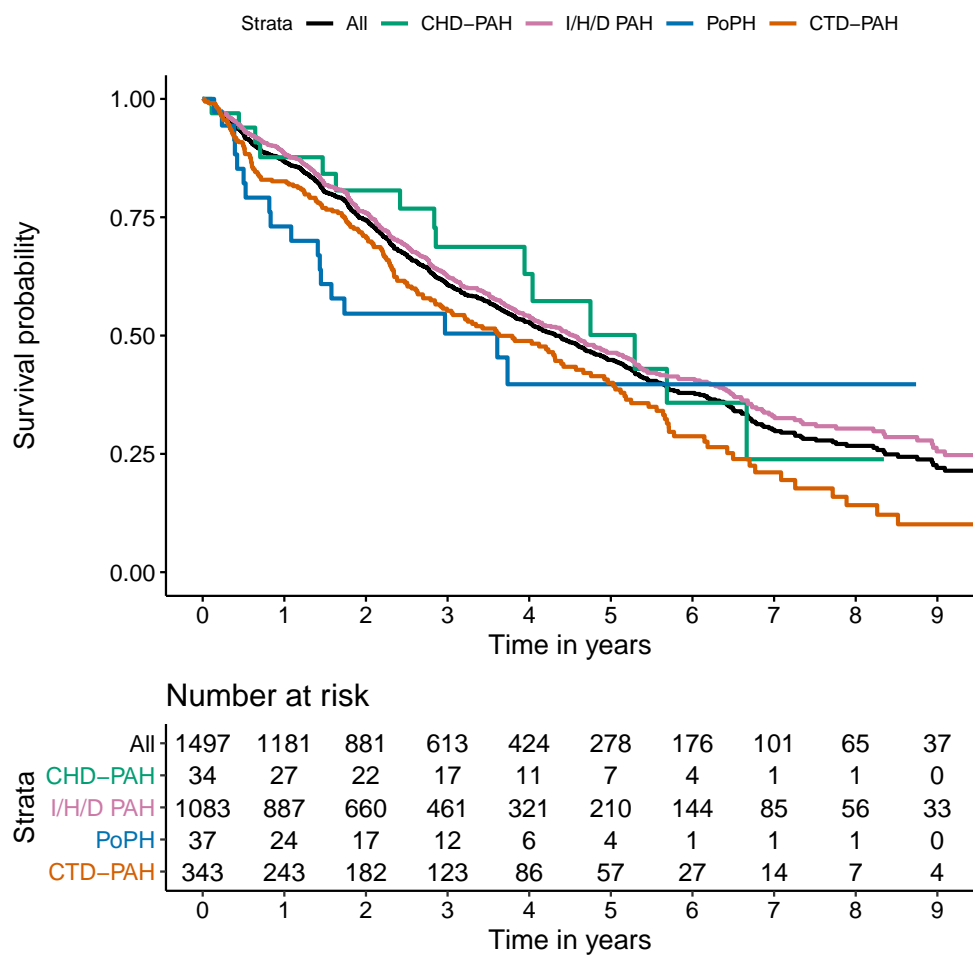

Figure S2c: Kaplan-Meier survival estimates for patients with I/H/D-PAH, no comorbidities and DLCO > 45%

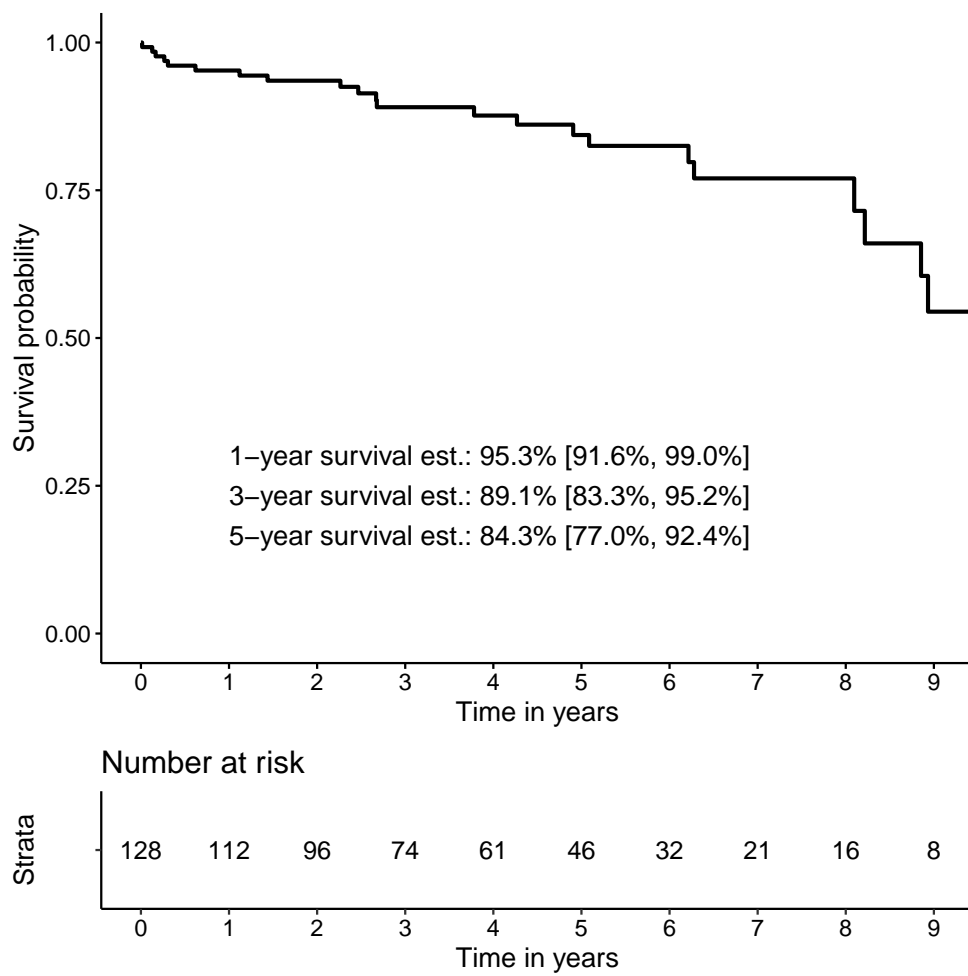

Table S1a: Baseline characteristics of adult patients newly diagnosed with PAH between 2010 and 2019: No. (%), mean (SD) or median [Q1 - Q3]. Subgroup of 1031 patients <65 years old at baseline.

|                                     | All PAH<br>n=1031 (100<br>%) | I/H/D PAH<br>n=615<br>(59.7%) | CTD-PAH<br>n=193<br>(18.7%) | CHD-PAH<br>n=94 (9.1%) | HIV-PAH<br>n=21 (2.0%) | PoPH<br>n=108<br>(10.5%) |
|-------------------------------------|------------------------------|-------------------------------|-----------------------------|------------------------|------------------------|--------------------------|
| Age, years                          | 49.0 (12.3)                  | 48.6 (12.8)                   | 52.5 (10.8)                 | 42.2 (12.9)            | 42.4 (8.4)             | 52.5 (7.9)               |
| Female                              | 669 (64.9%)                  | 395 (64.2%)                   | 153 (79.3%)                 | 66 (70.2%)             | 11 (52.4%)             | 44 (40.7%)               |
| BMI, kg/m <sup>2</sup>              | 28.1 (6.9)                   | 28.4 (7.0)                    | 27.5 (6.3)                  | 26.0 (6.7)             | 27.9 (8.7)             | 30.0 (6.6)               |
| WHO FC                              |                              |                               |                             |                        |                        |                          |
| I                                   | 12 (1.3%)                    | 6 (1.1%)                      | 0 (0.0%)                    | 4 (4.9%)               | 1 (4.8%)               | 1 (1.0%)                 |
| II                                  | 214 (22.6%)                  | 136 (24.1%)                   | 37 (20.4%)                  | 22 (27.2%)             | 6 (28.6%)              | 13 (12.9%)               |
| III                                 | 622 (65.6%)                  | 357 (63.3%)                   | 128 (70.7%)                 | 49 (60.5%)             | 12 (57.1%)             | 76 (75.2%)               |
| IV                                  | 100 (10.5%)                  | 65 (11.5%)                    | 16 (8.8%)                   | 6 (7.4%)               | 2 (9.5%)               | 11 (10.9%)               |
| 6MWD, m                             | 347.2 (133.4)                | 354.9 (136.7)                 | 325.6 (128.2)               | 361.3 (109.4)          | 398.0 (133.3)          | 321.5 (134.1)            |
| Pulmonary function test             |                              |                               |                             |                        |                        |                          |
| TLC, % pred                         | 90.8 (17.5)                  | 93.6 (16.8)                   | 83.0 (18.1)                 | 85.5 (14.5)            | 91.4 (10.5)            | 95.7 (16.1)              |
| FVC, % pred                         | 81.2 (20.9)                  | 82.6 (20.9)                   | 79.0 (21.8)                 | 72.6 (19.1)            | 85.0 (11.8)            | 83.7 (18.9)              |
| FEV <sub>1</sub> , % pred           | 76.2 (20.6)                  | 76.2 (21.2)                   | 76.9 (19.7)                 | 67.3 (17.6)            | 81.8 (14.7)            | 79.6 (20.2)              |
| DLCO, % pred                        | 54.8 (22.0)                  | 58.0 (23.1)                   | 42.8 (16.7)                 | 63.8 (16.9)            | 55.3 (6.4)             | 58.8 (15.4)              |
| PaO <sub>2</sub> , mmHg             | 67.7 (12.4)                  | 67.7 (13.0)                   | 67.3 (11.5)                 | 65.5 (8.4)             | 75.5 (16.8)            | 70.0 (11.7)              |
| PaCO <sub>2</sub> , mmHg            | 34.1 (6.5)                   | 34.5 (7.0)                    | 33.3 (5.8)                  | 35.0 (6.7)             | 35.0 (1.4)             | 32.6 (4.2)               |
| Smoking history                     |                              |                               |                             |                        |                        |                          |
| current                             | 75 (16.2%)                   | 56 (15.7%)                    | 5 (10.0%)                   | 3 (14.3%)              | 0 (0.0%)               | 11 (33.3%)               |
| former                              | 190 (40.9%)                  | 144 (40.3%)                   | 21 (42.0%)                  | 8 (38.1%)              | 2 (66.7%)              | 15 (45.5%)               |
| never                               | 199 (42.9%)                  | 157 (44.0%)                   | 24 (48.0%)                  | 10 (47.6%)             | 1 (33.3%)              | 7 (21.2%)                |
| if current or former:<br>Pack years | 25.0 [15.0,<br>40.0]         | 25.0 [15.0,<br>40.0]          | 29.0 [20.0,<br>39.2]        | 10.0 [10.0,<br>25.0]   | NA [NA, NA]            | 20.0 [17.5,<br>32.5]     |
| Comorbid conditions                 |                              |                               |                             |                        |                        |                          |
| Obesity (BMI > 30)                  | 344 (34.2%)                  | 211 (35.0%)                   | 52 (28.1%)                  | 26 (27.7%)             | 6 (33.3%)              | 49 (45.8%)               |
| Hypertension                        | 345 (40.0%)                  | 236 (44.2%)                   | 55 (38.2%)                  | 17 (20.5%)             | 6 (46.2%)              | 31 (34.8%)               |
| Coronary heart disease              | 103 (12.4%)                  | 70 (13.7%)                    | 16 (11.6%)                  | 4 (5.0%)               | 1 (7.7%)               | 12 (13.6%)               |
| Diabetes mellitus                   | 128 (14.9%)                  | 103 (19.4%)                   | 9 (6.4%)                    | 5 (6.1%)               | 0 (0.0%)               | 11 (12.1%)               |
| Haemodynamics                       |                              |                               |                             |                        |                        |                          |
| RAP, mmHg                           | 8.7 (5.2)                    | 8.8 (5.4)                     | 8.2 (5.1)                   | 7.9 (4.8)              | 8.4 (3.7)              | 9.6 (5.2)                |
| PAPm, mmHg                          | 49.1 (14.5)                  | 50.3 (14.2)                   | 43.5 (13.1)                 | 53.3 (20.1)            | 47.4 (11.2)            | 48.8 (10.7)              |
| PAWP, mmHg                          | 8.9 (3.3)                    | 8.8 (3.3)                     | 9.1 (3.3)                   | 9.1 (3.6)              | 7.6 (2.9)              | 9.5 (3.5)                |
| CI, L/min/m <sup>2</sup>            | 2.4 (0.9)                    | 2.3 (0.8)                     | 2.6 (0.9)                   | 2.8 (1.3)              | 2.2 (0.7)              | 2.7 (1.1)                |
| PVR, dyn·s·cm <sup>-5</sup>         | 826.6 (449.7)                | 889.6 (463.7)                 | 677.6 (370.4)               | 858.8 (547.0)          | 851.1 (319.5)          | 693.7 (339.9)            |
| PVR, WU                             | 10.3 (5.6)                   | 11.1 (5.8)                    | 8.5 (4.6)                   | 10.7 (6.8)             | 10.6 (4.0)             | 8.7 (4.2)                |
| SvO <sub>2</sub> , %                | 63.1 (9.4)                   | 62.0 (9.7)                    | 65.1 (8.1)                  | 65.1 (10.4)            | 57.1 (8.2)             | 65.2 (7.4)               |
| Laboratory findings                 |                              |                               |                             |                        |                        |                          |
| Creatinine, μmol/L                  | 90.0 (53.1)                  | 94.3 (60.9)                   | 85.0 (33.2)                 | 82.0 (53.5)            | 78.7 (20.6)            | 83.2 (29.3)              |
| Uric acid, μmol/L                   | 419.3 (156.1)                | 428.6 (149.1)                 | 422.4 (148.1)               | 385.3 (199.6)          | 345.7 (119.4)          | 406.7 (155.4)            |
| Bilirubin, μmol/L                   | 17.5 (16.2)                  | 16.2 (14.3)                   | 12.9 (10.2)                 | 15.5 (20.5)            | 25.7 (27.0)            | 30.5 (19.7)              |
| NT-proBNP, pg/mL                    | 903 [257,<br>2442]           | 1044 [308,<br>2799]           | 941 [254,<br>2740]          | 424 [196,<br>980]      | 1166 [204,<br>1959]    | 727 [170,<br>1802]       |
| BNP, pg/mL                          | 169 [77, 398]                | 187 [77, 397]                 | 228 [70, 530]               | 130 [36, 172]          | 175 [150,<br>201]      | 153 [133,<br>331]        |
| Risk                                |                              |                               |                             |                        |                        |                          |
| Low                                 | 182 (17.8%)                  | 113 (18.5%)                   | 29 (15.2%)                  | 20 (21.7%)             | 6 (28.6%)              | 14 (13.0%)               |
| Intermediate                        | 687 (67.1%)                  | 405 (66.2%)                   | 128 (67.0%)                 | 66 (71.7%)             | 13 (61.9%)             | 75 (69.4%)               |
| High                                | 155 (15.1%)                  | 94 (15.4%)                    | 34 (17.8%)                  | 6 (6.5%)               | 2 (9.5%)               | 19 (17.6%)               |

Table S1b: Baseline characteristics of adult patients newly diagnosed with PAH between 2010 and 2019: No. (%), mean (SD) or median [Q1 - Q3]. Subgroup of 1500 patients  $\geq 65$  years old at baseline.

|                                     | All PAH<br>n=1500 (100<br>%) | I/H/D PAH<br>n=1083<br>(72.2%) | CTD-PAH<br>n=343<br>(22.9%) | CHD-PAH<br>n=34 (2.3%) | HIV-PAH<br>n=3 (0.2%) | PoPH<br>n=37 (2.5%)  |
|-------------------------------------|------------------------------|--------------------------------|-----------------------------|------------------------|-----------------------|----------------------|
| Age, years                          | 75.3 (5.8)                   | 75.8 (5.8)                     | 74.1 (5.8)                  | 73.8 (5.2)             | 69.7 (1.2)            | 73.4 (5.2)           |
| Female                              | 940 (62.7%)                  | 621 (57.3%)                    | 281 (81.9%)                 | 18 (52.9%)             | 0 (0.0%)              | 20 (54.1%)           |
| BMI, kg/m <sup>2</sup>              | 28.0 (5.5)                   | 28.5 (5.6)                     | 26.3 (4.8)                  | 27.3 (6.0)             | 25.9 (4.1)            | 28.5 (4.7)           |
| WHO FC                              |                              |                                |                             |                        |                       |                      |
| I                                   | 3 (0.2%)                     | 1 (0.1%)                       | 2 (0.6%)                    | 0 (0.0%)               | 0 (0.0%)              | 0 (0.0%)             |
| II                                  | 159 (11.1%)                  | 108 (10.5%)                    | 41 (12.7%)                  | 4 (12.1%)              | 0 (0.0%)              | 6 (16.2%)            |
| III                                 | 1053 (73.6%)                 | 760 (73.6%)                    | 241 (74.4%)                 | 24 (72.7%)             | 2 (66.7%)             | 26 (70.3%)           |
| IV                                  | 215 (15.0%)                  | 164 (15.9%)                    | 40 (12.3%)                  | 5 (15.2%)              | 1 (33.3%)             | 5 (13.5%)            |
| 6MWD, m                             | 262.5 (110.1)                | 264.8 (109.0)                  | 250.1 (112.8)               | 303.0 (113.0)          | 195.3 (92.1)          | 277.0 (107.2)        |
| Pulmonary function test             |                              |                                |                             |                        |                       |                      |
| TLC, % pred                         | 89.0 (17.2)                  | 90.7 (16.1)                    | 84.5 (19.2)                 | 80.6 (16.9)            | 75.0 (NA)             | 92.5 (18.8)          |
| FVC, % pred                         | 79.3 (19.9)                  | 79.2 (19.4)                    | 80.5 (21.4)                 | 65.2 (16.5)            | 88.0 (NA)             | 80.0 (19.6)          |
| FEV <sub>1</sub> , % pred           | 76.5 (19.3)                  | 76.7 (19.3)                    | 76.9 (19.5)                 | 63.3 (15.5)            | 101.0 (NA)            | 76.8 (18.3)          |
| DLCO, % pred                        | 48.0 (21.2)                  | 49.1 (21.8)                    | 42.5 (17.2)                 | 70.2 (23.0)            | 22.0 (NA)             | 55.9 (22.5)          |
| PaO <sub>2</sub> , mmHg             | 63.4 (12.0)                  | 62.9 (12.0)                    | 64.1 (12.1)                 | 67.1 (13.0)            | 47.0 (NA)             | 66.4 (8.1)           |
| PaCO <sub>2</sub> , mmHg            | 35.8 (6.4)                   | 36.1 (6.0)                     | 34.8 (7.2)                  | 37.8 (3.8)             | 36.0 (NA)             | 34.0 (8.7)           |
| Smoking history                     |                              |                                |                             |                        |                       |                      |
| current                             | 21 (2.3%)                    | 20 (2.5%)                      | 0 (0.0%)                    | 0 (0.0%)               | 0 (0.0%)              | 1 (7.1%)             |
| former                              | 404 (44.0%)                  | 346 (43.6%)                    | 45 (44.6%)                  | 5 (55.6%)              | 0 (0.0%)              | 8 (57.1%)            |
| never                               | 494 (53.8%)                  | 428 (53.9%)                    | 56 (55.4%)                  | 4 (44.4%)              | 1 (100.0%)            | 5 (35.7%)            |
| if current or former:<br>Pack years | 30.0 [15.0,<br>45.0]         | 30.0 [15.0,<br>50.0]           | 20.0 [10.0,<br>30.0]        | 20.0 [13.8,<br>27.5]   | NA [NA, NA]           | 25.0 [20.0,<br>42.5] |
| Comorbid conditions                 |                              |                                |                             |                        |                       |                      |
| Obesity (BMI > 30)                  | 466 (31.7%)                  | 378 (35.2%)                    | 68 (21.1%)                  | 8 (23.5%)              | 0 (0.0%)              | 12 (32.4%)           |
| Hypertension                        | 984 (74.3%)                  | 771 (77.0%)                    | 170 (65.9%)                 | 19 (67.9%)             | 1 (50.0%)             | 23 (63.9%)           |
| Coronary heart disease              | 451 (34.9%)                  | 365 (37.0%)                    | 73 (29.7%)                  | 6 (21.4%)              | 0 (0.0%)              | 7 (21.9%)            |
| Diabetes mellitus                   | 462 (35.3%)                  | 386 (38.9%)                    | 52 (20.6%)                  | 13 (44.8%)             | 0 (0.0%)              | 11 (31.4%)           |
| Haemodynamics                       |                              |                                |                             |                        |                       |                      |
| RAP, mmHg                           | 8.0 (4.5)                    | 8.0 (4.3)                      | 7.5 (4.7)                   | 10.8 (7.0)             | 7.7 (7.2)             | 10.7 (5.5)           |
| PAPm, mmHg                          | 40.8 (10.4)                  | 40.8 (10.2)                    | 40.1 (10.4)                 | 44.1 (14.3)            | 44.3 (15.4)           | 43.4 (10.2)          |
| PAWP, mmHg                          | 9.9 (3.3)                    | 9.9 (3.3)                      | 9.5 (3.4)                   | 11.0 (3.3)             | 10.0 (3.5)            | 10.5 (3.3)           |
| CI, L/min/m <sup>2</sup>            | 2.2 (0.8)                    | 2.2 (0.7)                      | 2.4 (0.7)                   | 2.7 (0.8)              | 2.6 (2.4)             | 2.4 (1.1)            |
| PVR, dyn·s·cm <sup>-5</sup>         | 687.3 (357.4)                | 695.6 (363.4)                  | 674.4 (345.3)               | 599.3 (336.0)          | 1005.3<br>(577.6)     | 598.3 (250.8)        |
| PVR, WU                             | 8.6 (4.5)                    | 8.7 (4.5)                      | 8.4 (4.3)                   | 7.5 (4.2)              | 12.6 (7.2)            | 7.5 (3.1)            |
| SvO <sub>2</sub> , %                | 62.6 (8.0)                   | 62.5 (7.7)                     | 62.6 (9.0)                  | 66.4 (9.2)             | 58.0 (4.0)            | 62.5 (7.7)           |
| Laboratory findings                 |                              |                                |                             |                        |                       |                      |
| Creatinine, $\mu$ mol/L             | 109.2 (55.4)                 | 112.3 (58.9)                   | 100.7 (44.9)                | 98.9 (41.2)            | 105.7 (36.7)          | 104.7 (40.3)         |
| Uric acid, $\mu$ mol/L              | 446.3 (148.2)                | 449.7 (144.9)                  | 433.8 (157.0)               | 417.3 (153.8)          | 496.1 (29.0)          | 459.6 (169.8)        |
| Bilirubin, $\mu$ mol/L              | 14.4 (12.5)                  | 14.0 (10.3)                    | 12.9 (13.1)                 | 19.1 (24.4)            | 59.1 (56.9)           | 26.8 (20.9)          |
| NT-proBNP, pg/mL                    | 1819 [722,<br>4122]          | 1848 [762,<br>4120]            | 1828 [660,<br>4286]         | 1160 [641,<br>2310]    | 4499 [2332,<br>4775]  | 1235 [626,<br>3164]  |
| BNP, pg/mL                          | 244 [110,<br>553]            | 214 [110,<br>509]              | 310 [82, 704]               | 315 [142,<br>484]      | NA [NA, NA]           | 310 [278,<br>603]    |
| Risk                                |                              |                                |                             |                        |                       |                      |
| Low                                 | 64 (4.3%)                    | 40 (3.7%)                      | 20 (5.9%)                   | 2 (6.1%)               | 0 (0.0%)              | 2 (5.4%)             |
| Intermediate                        | 1011 (67.9%)                 | 739 (68.7%)                    | 221 (65.2%)                 | 25 (75.8%)             | 2 (66.7%)             | 24 (64.9%)           |
| High                                | 413 (27.8%)                  | 297 (27.6%)                    | 98 (28.9%)                  | 6 (18.2%)              | 1 (33.3%)             | 11 (29.7%)           |

Table S1c: Baseline characteristics of adult patients newly diagnosed with PAH between 2010 and 2019: No. (%), mean (SD) or median [Q1 - Q3]. Subgroup of 128 patients with I/H/D-PAH, no comorbidities and DLCO > 45%.

|                                     | I/H/D-PAH without<br>comorbidities and<br>DLCO > 45% |
|-------------------------------------|------------------------------------------------------|
| Age, years                          | 46.7 (18.2)                                          |
| Female                              | 96 (75.0%)                                           |
| BMI, kg/m <sup>2</sup>              | 24.1 (3.3)                                           |
| WHO FC                              |                                                      |
| I                                   | 2 (1.6%)                                             |
| II                                  | 30 (24.6%)                                           |
| III                                 | 80 (65.6%)                                           |
| IV                                  | 10 (8.2%)                                            |
| 6MWD, m                             | 388.3 (133.4)                                        |
| Pulmonary function test             |                                                      |
| TLC, % pred                         | 97.0 (15.2)                                          |
| FVC, % pred                         | 89.9 (17.7)                                          |
| FEV <sub>1</sub> , % pred           | 85.4 (17.2)                                          |
| DLCO, % pred                        | 69.2 (14.2)                                          |
| PaO <sub>2</sub> , mmHg             | 76.9 (10.2)                                          |
| PaCO <sub>2</sub> , mmHg            | 32.5 (3.7)                                           |
| Smoking history                     |                                                      |
| current                             | 10 (8.7%)                                            |
| former                              | 33 (28.7%)                                           |
| never                               | 72 (62.6%)                                           |
| if current or former:<br>Pack years | 16.0 [10.0, 29.0]                                    |
| Comorbid conditions                 |                                                      |
| Obesity (BMI > 30)                  | 0 (0.0%)                                             |
| Hypertension                        | 0 (0.0%)                                             |
| Coronary heart disease              | 0 (0.0%)                                             |
| Diabetes mellitus                   | 0 (0.0%)                                             |
| Haemodynamics                       |                                                      |
| RAP, mmHg                           | 6.9 (4.3)                                            |
| PAPm, mmHg                          | 48.1 (14.5)                                          |
| PAWP, mmHg                          | 8.0 (3.3)                                            |
| CI, L/min/m <sup>2</sup>            | 2.1 (0.7)                                            |
| PVR, dyn·s·cm <sup>-5</sup>         | 954.3 (468.6)                                        |
| PVR, WU                             | 11.9 (5.9)                                           |
| SvO <sub>2</sub> , %                | 63.4 (9.9)                                           |
| Laboratory findings                 |                                                      |
| Creatinine, μmol/L                  | 85.6 (32.4)                                          |
| Uric acid, μmol/L                   | 358.0 (132.3)                                        |
| Bilirubin, μmol/L                   | 13.2 (9.9)                                           |
| NT-proBNP, pg/mL                    | 1108 [370, 1932]                                     |
| BNP, pg/mL                          | 127 [68, 268]                                        |
| Risk                                |                                                      |
| Low                                 | 24 (18.8%)                                           |
| Intermediate                        | 93 (72.7%)                                           |
| High                                | 11 (8.6%)                                            |



Table S2: Baseline characteristics of adult patients newly diagnosed with PAH per year of diagnosis: No. (%), mean (SD) or median [Q1 - Q3]

|                         | 2010             | 2011             | 2012             | 2013             | 2014             | 2015             | 2016             | 2017             | 2018             | 2019             |
|-------------------------|------------------|------------------|------------------|------------------|------------------|------------------|------------------|------------------|------------------|------------------|
|                         | n=242<br>(9.6%)  | n=199<br>(7.9%)  | n=204<br>(8.1%)  | n=237<br>(9.4%)  | n=241<br>(9.5%)  | n=282<br>(11.1%) | n=301<br>(11.9%) | n=271<br>(10.7%) | n=268<br>(10.6%) | n=286<br>(11.3%) |
| Diagnosis               |                  |                  |                  |                  |                  |                  |                  |                  |                  |                  |
| I/H/D PAH               | 171<br>(70.7%)   | 122<br>(61.3%)   | 127<br>(62.3%)   | 145<br>(61.2%)   | 147<br>(61.0%)   | 178<br>(63.1%)   | 212<br>(70.4%)   | 181<br>(66.8%)   | 200<br>(74.6%)   | 215<br>(75.2%)   |
| CTD-PAH                 | 42 (17.4%)       | 48 (24.1%)       | 53 (26.0%)       | 51 (21.5%)       | 65 (27.0%)       | 65 (23.0%)       | 63 (20.9%)       | 63 (23.2%)       | 38 (14.2%)       | 48 (16.8%)       |
| CHD-PAH                 | 14 (5.8%)        | 11 (5.5%)        | 12 (5.9%)        | 12 (5.1%)        | 16 (6.6%)        | 21 (7.4%)        | 10 (3.3%)        | 10 (3.7%)        | 15 (5.6%)        | 7 (2.4%)         |
| HIV-PAH                 | 8 (3.3%)         | 4 (2.0%)         | 2 (1.0%)         | 4 (1.7%)         | 0 (0.0%)         | 0 (0.0%)         | 1 (0.3%)         | 2 (0.7%)         | 1 (0.4%)         | 2 (0.7%)         |
| PoPH                    | 7 (2.9%)         | 14 (7.0%)        | 10 (4.9%)        | 25 (10.5%)       | 13 (5.4%)        | 18 (6.4%)        | 15 (5.0%)        | 15 (5.5%)        | 14 (5.2%)        | 14 (4.9%)        |
| Age, years              | 65 (15)          | 62 (17)          | 64 (16)          | 61 (16)          | 62 (17)          | 63 (17)          | 67 (15)          | 67 (13)          | 66 (16)          | 66 (15)          |
| Female                  | 144<br>(59.5%)   | 132<br>(66.3%)   | 128<br>(62.7%)   | 146<br>(61.6%)   | 163<br>(67.6%)   | 179<br>(63.5%)   | 184<br>(61.1%)   | 175<br>(64.6%)   | 163<br>(60.8%)   | 195<br>(68.2%)   |
| BMI, kg/m <sup>2</sup>  | 27.6 (6.0)       | 27.7 (6.1)       | 27.7 (5.8)       | 27.3 (5.8)       | 28.1 (6.2)       | 27.4 (5.9)       | 28.3 (6.1)       | 29.0 (5.9)       | 28.3 (6.3)       | 28.5 (6.5)       |
| WHO FC                  |                  |                  |                  |                  |                  |                  |                  |                  |                  |                  |
| I                       | 3.0 (0.5)        | 3.0 (0.6)        | 3.0 (0.5)        | 3.0 (0.5)        | 2.9 (0.6)        | 3.0 (0.6)        | 3.1 (0.5)        | 2.9 (0.5)        | 2.9 (0.6)        | 2.9 (0.6)        |
| II                      | 0 (0.0%)         | 1 (0.5%)         | 2 (1.0%)         | 0 (0.0%)         | 1 (0.4%)         | 6 (2.3%)         | 0 (0.0%)         | 1 (0.4%)         | 0 (0.0%)         | 4 (1.5%)         |
| III                     | 30 (12.4%)       | 28 (14.4%)       | 23 (12.0%)       | 27 (11.8%)       | 39 (17.2%)       | 39 (15.1%)       | 28 (10.5%)       | 49 (19.5%)       | 52 (20.9%)       | 58 (21.5%)       |
| IV                      | 183<br>(75.9%)   | 138<br>(71.1%)   | 143<br>(74.5%)   | 167<br>(72.9%)   | 159<br>(70.0%)   | 171<br>(66.0%)   | 188<br>(70.7%)   | 179<br>(71.3%)   | 170<br>(68.3%)   | 177<br>(65.6%)   |
| 6MWD, m                 | 302.7<br>(118.2) | 293.9<br>(135.1) | 299.3<br>(131.8) | 294.8<br>(132.6) | 302.7<br>(125.6) | 313.4<br>(137.6) | 285.8<br>(118.2) | 293.3<br>(120.4) | 284.0<br>(125.6) | 302.9<br>(128.0) |
| Pulmonary function test |                  |                  |                  |                  |                  |                  |                  |                  |                  |                  |
| DLCO, % pred            | 47.5 (19.6)      | 51.3 (23.3)      | 50.5 (21.5)      | 52.9 (22.1)      | 52.8 (21.4)      | 50.7 (21.6)      | 46.1 (20.0)      | 54.0 (22.9)      | 50.6 (21.8)      | 49.8 (22.3)      |

Variables with high proportion of missing data were omitted.

Table S2: Baseline characteristics of adult patients newly diagnosed with PAH per year of diagnosis: No. (%), mean (SD) or median [Q1 - Q3], continued

|                             | 2010                    | 2011                    | 2012                    | 2013                    | 2014                    | 2015                    | 2016                        | 2017                        | 2018                    | 2019                        |
|-----------------------------|-------------------------|-------------------------|-------------------------|-------------------------|-------------------------|-------------------------|-----------------------------|-----------------------------|-------------------------|-----------------------------|
|                             | n=242<br>(9.6%)         | n=199<br>(7.9%)         | n=204<br>(8.1%)         | n=237<br>(9.4%)         | n=241<br>(9.5%)         | n=282<br>(11.1%)        | n=301<br>(11.9%)            | n=271<br>(10.7%)            | n=268<br>(10.6%)        | n=286<br>(11.3%)            |
| Comorbid conditions         |                         |                         |                         |                         |                         |                         |                             |                             |                         |                             |
| Obesity (BMI > 30)          | 1.5 (1.1)<br>60 (28.0%) | 1.3 (1.2)<br>54 (30.5%) | 1.3 (1.1)<br>67 (32.8%) | 1.3 (1.2)<br>69 (29.2%) | 1.4 (1.1)<br>77 (32.0%) | 1.3 (1.1)<br>89 (31.6%) | 1.5 (1.1)<br>108<br>(35.9%) | 1.6 (1.1)<br>100<br>(37.3%) | 1.6 (1.2)<br>84 (31.3%) | 1.6 (1.2)<br>102<br>(35.8%) |
| Hypertension                | 108<br>(67.9%)          | 50 (44.6%)              | 64 (50.0%)              | 115<br>(55.6%)          | 124<br>(56.4%)          | 165<br>(59.1%)          | 190<br>(64.4%)              | 172<br>(66.4%)              | 161<br>(63.6%)          | 180<br>(65.2%)              |
| Coronary heart disease      | 37 (24.8%)              | 26 (23.4%)              | 33 (25.2%)              | 47 (23.5%)              | 55 (25.6%)              | 56 (21.1%)              | 71 (24.5%)                  | 66 (26.7%)                  | 79 (31.3%)              | 84 (31.8%)                  |
| Diabetes mellitus           | 47 (31.1%)              | 37 (32.7%)              | 33 (24.6%)              | 49 (23.2%)              | 51 (22.9%)              | 58 (20.9%)              | 77 (26.6%)                  | 76 (30.2%)                  | 81 (32.9%)              | 81 (30.0%)                  |
| Haemodynamics               |                         |                         |                         |                         |                         |                         |                             |                             |                         |                             |
| RAP, mmHg                   | 8.4 (4.6)               | 8.8 (5.1)               | 9.0 (5.0)               | 9.2 (5.7)               | 7.7 (5.2)               | 7.8 (4.9)               | 7.8 (4.3)                   | 8.7 (4.7)                   | 8.0 (4.2)               | 7.7 (4.5)                   |
| PAPm, mmHg                  | 44.2 (13.1)             | 45.2 (13.1)             | 45.8 (14.9)             | 46.4 (12.8)             | 46.3 (14.3)             | 44.0 (12.6)             | 41.6 (11.8)                 | 44.6 (11.8)                 | 42.8 (12.5)             | 42.5 (12.1)                 |
| PAWP, mmHg                  | 9.5 (3.5)               | 9.7 (3.6)               | 9.5 (3.3)               | 9.6 (3.2)               | 9.1 (3.6)               | 9.1 (3.2)               | 9.4 (3.3)                   | 10.3 (3.2)                  | 9.4 (3.2)               | 9.3 (3.5)                   |
| CI, L/min/m <sup>2</sup>    | 2.2 (0.8)               | 2.4 (0.9)               | 2.4 (0.8)               | 2.4 (0.8)               | 2.4 (0.8)               | 2.3 (0.9)               | 2.2 (0.7)                   | 2.3 (0.7)                   | 2.4 (1.0)               | 2.3 (0.8)                   |
| PVR, dyn·s·cm <sup>-5</sup> | 773.7<br>(409.9)        | 743.3<br>(379.3)        | 763.3<br>(443.7)        | 782.8<br>(414.3)        | 793.4<br>(429.6)        | 772.0<br>(454.6)        | 696.4<br>(364.4)            | 718.6<br>(393.2)            | 708.8<br>(376.1)        | 696.5<br>(350.3)            |
| PVR, WU                     | 9.7 (5.1)               | 9.3 (4.7)               | 9.5 (5.5)               | 9.8 (5.2)               | 9.9 (5.4)               | 9.7 (5.7)               | 8.7 (4.6)                   | 9.0 (4.9)                   | 8.9 (4.7)               | 8.7 (4.4)                   |
| SvO <sub>2</sub> , %        | 62.5 (8.0)              | 62.7 (8.6)              | 62.8 (8.5)              | 63.1 (9.2)              | 63.0 (9.2)              | 63.0 (9.4)              | 62.6 (8.9)                  | 62.8 (8.6)                  | 62.3 (7.9)              | 63.0 (7.3)                  |
| Laboratory findings         |                         |                         |                         |                         |                         |                         |                             |                             |                         |                             |
| Creatinine, μmol/L          | 103.6<br>(59.6)         | 96.1 (50.5)             | 96.8 (44.3)             | 102.6<br>(65.4)         | 93.3 (35.5)             | 99.1 (39.7)             | 110.8<br>(70.1)             | 110.4<br>(78.8)             | 101.0<br>(46.0)         | 98.5 (38.5)                 |
| NT-proBNP, pg/mL            | 1804 [767,<br>4582]     | 1358 [433,<br>3562]     | 1497 [505,<br>3492]     | 1405 [447,<br>3035]     | 1239 [365,<br>3091]     | 1246 [390,<br>3446]     | 1808 [729,<br>3305]         | 1424 [471,<br>3562]         | 1504 [541,<br>2826]     | 1097 [458,<br>3482]         |
| Risk                        |                         |                         |                         |                         |                         |                         |                             |                             |                         |                             |
| Low                         | 20 (8.3%)               | 19 (9.6%)               | 15 (7.4%)               | 23 (9.7%)               | 28 (11.7%)              | 34 (12.2%)              | 19 (6.4%)                   | 21 (7.8%)                   | 31 (11.6%)              | 36 (12.7%)                  |
| Intermediate                | 182<br>(75.2%)          | 140<br>(70.7%)          | 142<br>(70.0%)          | 157<br>(66.5%)          | 155<br>(64.9%)          | 170<br>(61.2%)          | 189<br>(63.9%)              | 197<br>(73.0%)              | 177<br>(66.3%)          | 189<br>(66.8%)              |
| High                        | 40 (16.5%)              | 39 (19.7%)              | 46 (22.7%)              | 56 (23.7%)              | 56 (23.4%)              | 74 (26.6%)              | 88 (29.7%)                  | 52 (19.3%)                  | 59 (22.1%)              | 58 (20.5%)                  |

Variables with high proportion of missing data were omitted.

Table S3a: Use of PAH drugs within 3 months and within 1, 2 and 3 ( $\pm 6$  months) years after diagnosis, n (%). Percentages refer to subgroups only, if applicable. Subgroup of patients <65 years old at baseline.

|                                                         | 3 months<br>(n=963) | 1 year<br>(n=899) | 2 years<br>(n=751) | 3 years<br>(n=590) |
|---------------------------------------------------------|---------------------|-------------------|--------------------|--------------------|
| No therapy                                              | 6 (0.6%)            | 23 (2.6%)         | 16 (2.1%)          | 18 (3.1%)          |
| Monotherapy                                             | 674 (70.0%)         | 374 (41.6%)       | 268 (35.7%)        | 199 (33.7%)        |
| ERA                                                     | 168 (24.9%)         | 99 (26.5%)        | 68 (25.4%)         | 54 (27.1%)         |
| PDE5i                                                   | 434 (64.4%)         | 237 (63.4%)       | 173 (64.6%)        | 129 (64.8%)        |
| sGCs                                                    | 27 (4.0%)           | 11 (2.9%)         | 7 (2.6%)           | 4 (2.0%)           |
| PCA                                                     | 4 (0.6%)            | 2 (0.5%)          | 0 (0.0%)           | 1 (0.5%)           |
| PCA oral or inhaled <sup>1</sup>                        | 0 (0.0%)            | 1 (50.0%)         | 0 (NaN%)           | 0 (0.0%)           |
| PCA SC or IV <sup>2</sup>                               | 4 (100.0%)          | 1 (50.0%)         | 0 (NaN%)           | 1 (100.0%)         |
| CCB                                                     | 41 (6.1%)           | 25 (6.7%)         | 20 (7.5%)          | 11 (5.5%)          |
| Other PAH treatment                                     | 0 (0.0%)            | 0 (0.0%)          | 0 (0.0%)           | 0 (0.0%)           |
| Combination therapy                                     | 283 (29.4%)         | 502 (55.8%)       | 467 (62.2%)        | 373 (63.2%)        |
| ERA+PDE5i                                               | 193 (68.2%)         | 322 (64.1%)       | 290 (62.1%)        | 221 (59.2%)        |
| Other than ERA+PDE5i                                    | 90 (31.8%)          | 180 (35.9%)       | 177 (37.9%)        | 152 (40.8%)        |
| ERA+PDE-5+PCA                                           | 29 (32.2%)          | 68 (37.8%)        | 70 (39.5%)         | 71 (46.7%)         |
| Triple combination therapy incl. IV/SC PCA <sup>3</sup> | 20 (22.2%)          | 35 (19.4%)        | 39 (22.0%)         | 42 (27.6%)         |

<sup>1</sup> Selexipag, Iloprost inhaled, Treprostinil inhaled, Beraprost

<sup>2</sup> Epoprostenol, Iloprost intravenously, Treprostinil intravenously/subcutaneously

<sup>3</sup> All triple combination therapies that include IV or SC PCA therapy

Table S3b: Use of PAH drugs within 3 months and within 1, 2 and 3 ( $\pm 6$  months) years after diagnosis, n (%). Percentages refer to subgroups only, if applicable. Subgroup of patients  $\geq 65$  years old at baseline.

|                                                         | 3 months<br>(n=1412) | 1 year<br>(n=1237) | 2 years<br>(n=976) | 3 years<br>(n=709) |
|---------------------------------------------------------|----------------------|--------------------|--------------------|--------------------|
| No therapy                                              | 2 (0.1%)             | 50 (4.0%)          | 45 (4.6%)          | 30 (4.2%)          |
| Monotherapy                                             | 1227 (86.9%)         | 772 (62.4%)        | 573 (58.7%)        | 405 (57.1%)        |
| ERA                                                     | 233 (19.0%)          | 124 (16.1%)        | 77 (13.4%)         | 45 (11.1%)         |
| PDE5i                                                   | 941 (76.7%)          | 614 (79.5%)        | 469 (81.8%)        | 338 (83.5%)        |
| sGCs                                                    | 36 (2.9%)            | 29 (3.8%)          | 24 (4.2%)          | 19 (4.7%)          |
| PCA                                                     | 2 (0.2%)             | 1 (0.1%)           | 1 (0.2%)           | 0 (0.0%)           |
| PCA oral or inhaled <sup>1</sup>                        | 1 (50.0%)            | 1 (100.0%)         | 1 (100.0%)         | 0 (NaN%)           |
| PCA SC or IV <sup>2</sup>                               | 1 (50.0%)            | 0 (0.0%)           | 0 (0.0%)           | 0 (NaN%)           |
| CCB                                                     | 10 (0.8%)            | 4 (0.5%)           | 2 (0.3%)           | 3 (0.7%)           |
| Other PAH treatment                                     | 5 (0.4%)             | 0 (0.0%)           | 0 (0.0%)           | 0 (0.0%)           |
| Combination therapy                                     | 183 (13.0%)          | 415 (33.5%)        | 358 (36.7%)        | 274 (38.6%)        |
| ERA+PDE5i                                               | 127 (69.4%)          | 297 (71.6%)        | 249 (69.6%)        | 179 (65.3%)        |
| Other than ERA+PDE5i                                    | 56 (30.6%)           | 118 (28.4%)        | 109 (30.4%)        | 95 (34.7%)         |
| ERA+PDE-5+PCA                                           | 4 (7.1%)             | 38 (32.2%)         | 40 (36.7%)         | 33 (34.7%)         |
| Triple combination therapy incl. IV/SC PCA <sup>3</sup> | 1 (1.8%)             | 9 (7.6%)           | 8 (7.3%)           | 3 (3.2%)           |

<sup>1</sup> Selexipag, Iloprost inhaled, Treprostinil inhaled, Beraprost

<sup>2</sup> Epoprostenol, Iloprost intravenously, Treprostinil intravenously/subcutaneously

<sup>3</sup> All triple combination therapies that include IV or SC PCA therapy

Table S3c: Use of PAH drugs within 3 months and within 1, 2 and 3 ( $\pm 6$  months) years after diagnosis, n (%). Percentages refer to subgroups only, if applicable. Subgroup of patients with I/H/D-PAH.

|                                                         | 3 months<br>(n=1593) | 1 year<br>(n=1457) | 2 years<br>(n=1192) | 3 years<br>(n=891) |
|---------------------------------------------------------|----------------------|--------------------|---------------------|--------------------|
| No therapy                                              | 0 (0.0%)             | 47 (3.2%)          | 40 (3.4%)           | 36 (4.0%)          |
| Monotherapy                                             | 1285 (80.7%)         | 810 (55.6%)        | 603 (50.6%)         | 426 (47.8%)        |
| ERA                                                     | 200 (15.6%)          | 122 (15.1%)        | 80 (13.3%)          | 47 (11.0%)         |
| PDE5i                                                   | 985 (76.7%)          | 629 (77.7%)        | 479 (79.4%)         | 348 (81.7%)        |
| sGCs                                                    | 43 (3.3%)            | 30 (3.7%)          | 22 (3.6%)           | 16 (3.8%)          |
| PCA                                                     | 6 (0.5%)             | 1 (0.1%)           | 0 (0.0%)            | 1 (0.2%)           |
| PCA oral or inhaled <sup>1</sup>                        | 1 (16.7%)            | 0 (0.0%)           | 0 (NaN%)            | 0 (0.0%)           |
| PCA SC or IV <sup>2</sup>                               | 5 (83.3%)            | 1 (100.0%)         | 0 (NaN%)            | 1 (100.0%)         |
| CCB                                                     | 48 (3.7%)            | 28 (3.5%)          | 22 (3.6%)           | 14 (3.3%)          |
| Other PAH treatment                                     | 3 (0.2%)             | 0 (0.0%)           | 0 (0.0%)            | 0 (0.0%)           |
| Combination therapy                                     | 308 (19.3%)          | 600 (41.2%)        | 549 (46.1%)         | 429 (48.1%)        |
| ERA+PDE5i                                               | 198 (64.3%)          | 383 (63.8%)        | 330 (60.1%)         | 243 (56.6%)        |
| Other than ERA+PDE5i                                    | 110 (35.7%)          | 217 (36.2%)        | 219 (39.9%)         | 186 (43.4%)        |
| ERA+PDE-5+PCA                                           | 24 (21.8%)           | 72 (38.5%)         | 74 (39.4%)          | 78 (45.6%)         |
| Triple combination therapy incl. IV/SC PCA <sup>3</sup> | 16 (14.5%)           | 33 (15.2%)         | 32 (14.6%)          | 35 (18.8%)         |

<sup>1</sup> Selexipag, Iloprost inhaled, Treprostinil inhaled, Beraprost

<sup>2</sup> Epoprostenol, Iloprost intravenously, Treprostinil intravenously/subcutaneously

<sup>3</sup> All triple combination therapies that include IV or SC PCA therapy

Table S3d: Use of PAH drugs within 3 months and within 1, 2 and 3 ( $\pm 6$  months) years after diagnosis, n (%). Percentages refer to subgroups only, if applicable. Subgroup of patients with CTD-PAH.

|                                                         | 3 months<br>(n=501) | 1 year<br>(n=431) | 2 years<br>(n=328) | 3 years<br>(n=242) |
|---------------------------------------------------------|---------------------|-------------------|--------------------|--------------------|
| No therapy                                              | 0 (0.0%)            | 19 (4.4%)         | 11 (3.4%)          | 7 (2.9%)           |
| Monotherapy                                             | 391 (78.0%)         | 203 (47.1%)       | 140 (42.7%)        | 101 (41.7%)        |
| ERA                                                     | 137 (35.0%)         | 65 (32.0%)        | 40 (28.6%)         | 27 (26.7%)         |
| PDE5i                                                   | 239 (61.1%)         | 130 (64.0%)       | 91 (65.0%)         | 68 (67.3%)         |
| sGCs                                                    | 12 (3.1%)           | 7 (3.4%)          | 8 (5.7%)           | 6 (5.9%)           |
| PCA                                                     | 0 (0.0%)            | 1 (0.5%)          | 1 (0.7%)           | 0 (0.0%)           |
| PCA oral or inhaled <sup>1</sup>                        | 0 (NaN%)            | 1 (100.0%)        | 1 (100.0%)         | 0 (NaN%)           |
| PCA SC or IV <sup>2</sup>                               | 0 (NaN%)            | 0 (0.0%)          | 0 (0.0%)           | 0 (NaN%)           |
| CCB                                                     | 1 (0.3%)            | 0 (0.0%)          | 0 (0.0%)           | 0 (0.0%)           |
| Other PAH treatment                                     | 2 (0.5%)            | 0 (0.0%)          | 0 (0.0%)           | 0 (0.0%)           |
| Combination therapy                                     | 110 (22.0%)         | 209 (48.5%)       | 177 (54.0%)        | 134 (55.4%)        |
| ERA+PDE5i                                               | 85 (77.3%)          | 159 (76.1%)       | 135 (76.3%)        | 96 (71.6%)         |
| Other than ERA+PDE5i                                    | 25 (22.7%)          | 50 (23.9%)        | 42 (23.7%)         | 38 (28.4%)         |
| ERA+PDE-5+PCA                                           | 6 (24.0%)           | 25 (32.5%)        | 23 (39.0%)         | 14 (34.1%)         |
| Triple combination therapy incl. IV/SC PCA <sup>3</sup> | 3 (12.0%)           | 7 (14.0%)         | 12 (28.6%)         | 5 (13.2%)          |

<sup>1</sup> Selexipag, Iloprost inhaled, Treprostinil inhaled, Beraprost

<sup>2</sup> Epoprostenol, Iloprost intravenously, Treprostinil intravenously/subcutaneously

<sup>3</sup> All triple combination therapies that include IV or SC PCA therapy

Table S3e: Use of PAH drugs within 3 months and within 1, 2 and 3 ( $\pm 6$  months) years after diagnosis, n (%). Percentages refer to subgroups only, if applicable. Subgroup of patients with I/H/D-PAH, no comorbidities and DLCO > 45%.

|                                                         | 3 months<br>(n=121) | 1 year<br>(n=112) | 2 years<br>(n=108) | 3 years<br>(n=79) |
|---------------------------------------------------------|---------------------|-------------------|--------------------|-------------------|
| No therapy                                              | 0 (0.0%)            | 0 (0.0%)          | 0 (0.0%)           | 0 (0.0%)          |
| Monotherapy                                             | 72 (59.5%)          | 41 (36.6%)        | 36 (33.3%)         | 27 (34.2%)        |
| ERA                                                     | 9 (12.5%)           | 9 (22.0%)         | 8 (22.2%)          | 5 (18.5%)         |
| PDE5i                                                   | 42 (58.3%)          | 22 (53.7%)        | 18 (50.0%)         | 15 (55.6%)        |
| sGCs                                                    | 2 (2.8%)            | 0 (0.0%)          | 0 (0.0%)           | 1 (3.7%)          |
| PCA                                                     | 0 (0.0%)            | 0 (0.0%)          | 0 (0.0%)           | 0 (0.0%)          |
| PCA oral or inhaled <sup>1</sup>                        | 0 (NaN%)            | 0 (NaN%)          | 0 (NaN%)           | 0 (NaN%)          |
| PCA SC or IV <sup>2</sup>                               | 0 (NaN%)            | 0 (NaN%)          | 0 (NaN%)           | 0 (NaN%)          |
| CCB                                                     | 19 (26.4%)          | 10 (24.4%)        | 10 (27.8%)         | 6 (22.2%)         |
| Other PAH treatment                                     | 0 (0.0%)            | 0 (0.0%)          | 0 (0.0%)           | 0 (0.0%)          |
| Combination therapy                                     | 49 (40.5%)          | 71 (63.4%)        | 72 (66.7%)         | 52 (65.8%)        |
| ERA+PDE5i                                               | 29 (59.2%)          | 31 (43.7%)        | 30 (41.7%)         | 20 (38.5%)        |
| Other than ERA+PDE5i                                    | 20 (40.8%)          | 40 (56.3%)        | 42 (58.3%)         | 32 (61.5%)        |
| ERA+PDE-5+PCA                                           | 8 (40.0%)           | 11 (47.8%)        | 3 (21.4%)          | 6 (42.9%)         |
| Triple combination therapy incl. IV/SC PCA <sup>3</sup> | 6 (30.0%)           | 10 (25.0%)        | 7 (16.7%)          | 5 (15.6%)         |

<sup>1</sup> Selexipag, Iloprost inhaled, Treprostinil inhaled, Beraprost

<sup>2</sup> Epoprostenol, Iloprost intravenously, Treprostinil intravenously/subcutaneously

<sup>3</sup> All triple combination therapies that include IV or SC PCA therapy

Table S4: Median doses of PAH drugs within 3 months and within 1 ( $\pm 6$  months) year after diagnosis and number of patients with available data.

|                                         | 3 months    |      | 1 year      |     |
|-----------------------------------------|-------------|------|-------------|-----|
|                                         | Median dose | n    | Median dose | n   |
| ERA                                     |             |      |             |     |
| Ambrisentan [mg/day]                    | 5.0         | 197  | 5.0         | 268 |
| Bosentan [mg/day]                       | 125.0       | 212  | 250.0       | 239 |
| Macitentan [mg/day]                     | 10.0        | 365  | 10.0        | 557 |
| PDE5i                                   |             |      |             |     |
| Sildenafil [mg/day]                     | 60.0        | 1037 | 60.0        | 834 |
| Tadalafil [mg/day]                      | 20.0        | 727  | 40.0        | 819 |
| PCA                                     |             |      |             |     |
| Epoprostenol [ng/kg/min]                | 7.5         | 9    | 12.0        | 11  |
| Iloprost inhaled [ $\mu$ g/day]         | 15.0        | 27   | 30.0        | 62  |
| Selexipag [ $\mu$ g/day]                | 800.0       | 8    | 1600.0      | 57  |
| Treprostinil intravenously [ng/kg/min]  | 10.0        | 7    | 32.0        | 22  |
| Treprostinil subcutaneously [ng/kg/min] | 17.0        | 11   | 24.0        | 22  |
| sGC                                     |             |      |             |     |
| Riociguat [mg/day]                      | 3.0         | 90   | 6.0         | 121 |

Figure S3: Treatment type at inclusion (within 3 months after diagnosis) and 1 year ( $\pm 6$  months) after diagnosis for the years 2010 to 2019, for I/H/D-PAH (a) and CTD-PAH (b) patients, as well as for the years 2010 to 2014 and 2015 to 2019 for patients with I/H/D-PAH, no comorbidities and DLCO  $> 45\%$  (c).

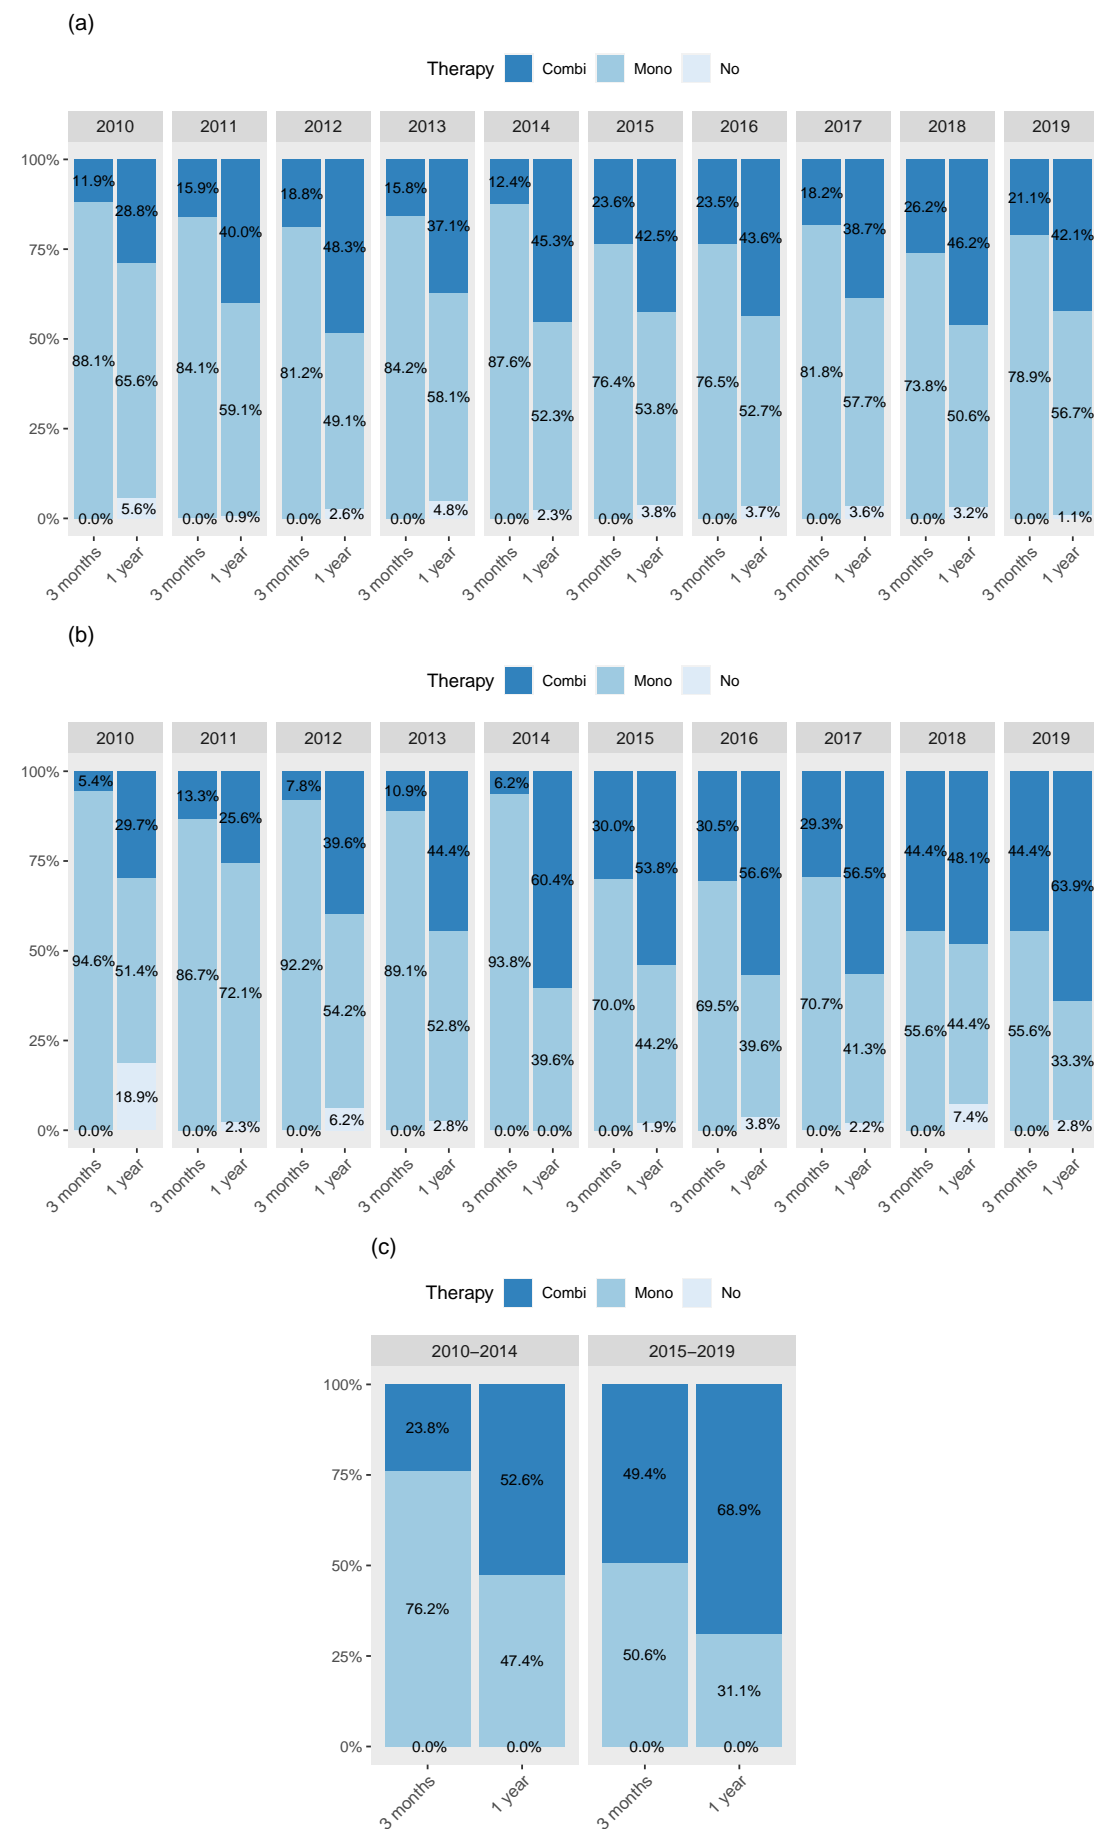

Figure S4: Estimated survival probability at 1 year (black) and 3 years (red) after inclusion with 95% confidence interval and number of patients at risk, for I/H/D-PAH patients (a) and CTD-PAH patients (b).

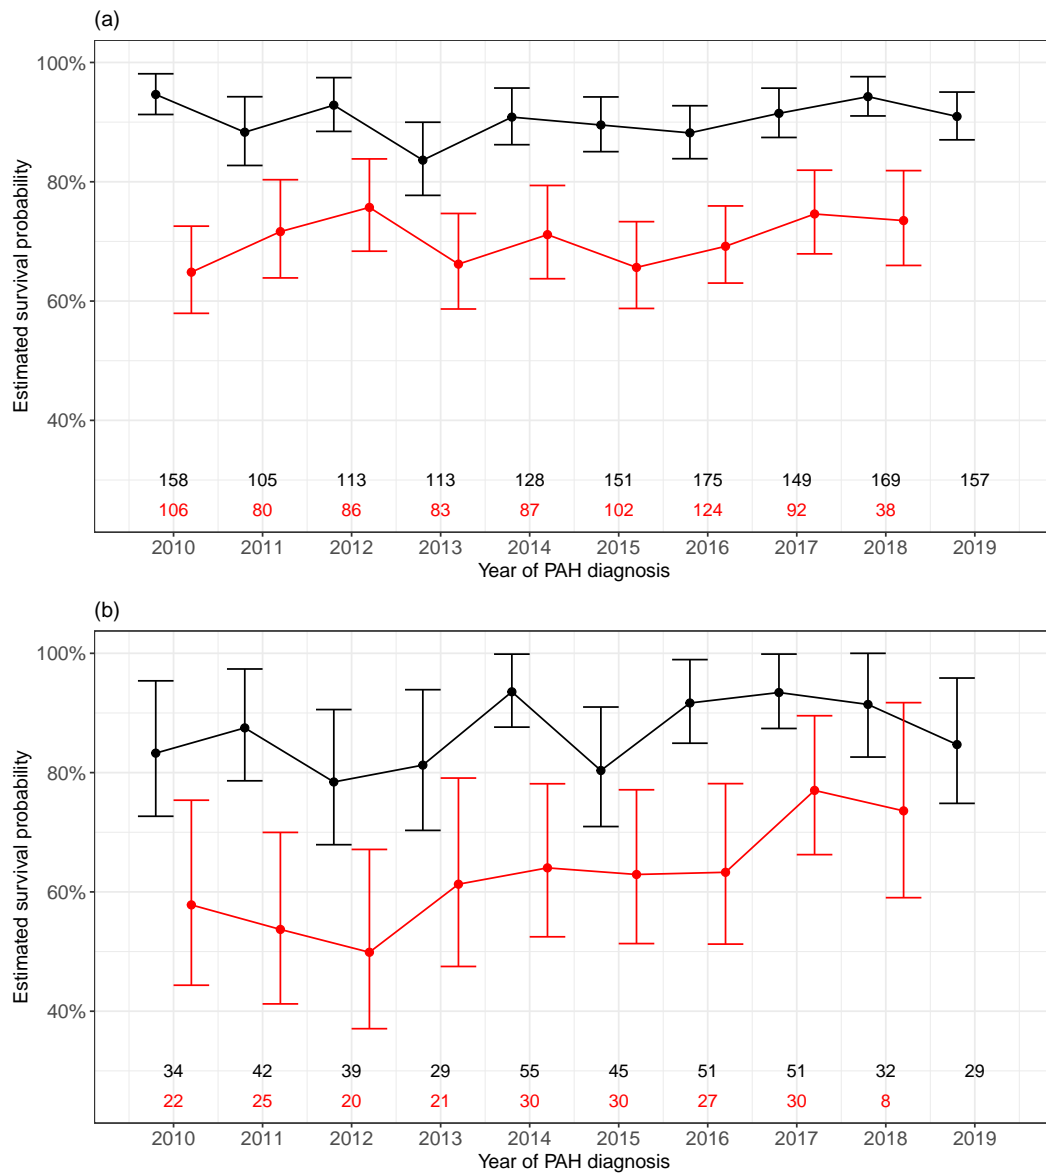

Supplement: inline-supplementary-material-1 [file inline-supplementary-material-1.pdf]
