# Supplementary material
Source: HighWire-hosted journal article supplement (https://erj.ersjournals.com/content/59/6/2102024)
Supplement: inline-supplementary-material-2 [file inline-supplementary-material-2.pdf]

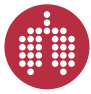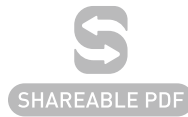

# Temporal trends in pulmonary arterial hypertension: results from the COMPERA registry

Marius M. Hoeper <sup>1,2</sup>, Christine Pausch <sup>3</sup>, Ekkehard Grünig <sup>2,4</sup>, Gerd Staehler <sup>5</sup>, Doerte Huscher <sup>6</sup>, David Pittrow <sup>3,7</sup>, Karen M. Olsson <sup>1,2</sup>, Carmine Dario Vizza <sup>8</sup>, Henning Gall <sup>2,9</sup>, Oliver Distler <sup>10</sup>, Christian Opitz <sup>11</sup>, J. Simon R. Gibbs <sup>12</sup>, Marion Delcroix <sup>13</sup>, H. Ardeschir Ghofrani <sup>2,9,14</sup>, Stephan Rosenkranz <sup>15</sup>, Da-Hee Park <sup>1</sup>, Ralf Ewert <sup>16</sup>, Harald Kaemmerer <sup>17</sup>, Tobias J. Lange <sup>18</sup>, Hans-Joachim Kabitz <sup>19</sup>, Dirk Skowasch <sup>20</sup>, Andris Skride <sup>21</sup>, Martin Claussen <sup>22</sup>, Juergen Behr <sup>23,24,25</sup>, Katrin Milger <sup>24,25</sup>, Michael Halank <sup>26</sup>, Heinrike Wilkens <sup>27</sup>, Hans-Jürgen Seyfarth <sup>28</sup>, Matthias Held <sup>29</sup>, Daniel Dumitrescu <sup>30</sup>, Iraklis Tsangaris <sup>31</sup>, Anton Vonk-Noordegraaf <sup>32</sup>, Silvia Ulrich <sup>33</sup> and Hans Klöse <sup>34</sup>

<sup>1</sup>Dept of Respiratory Medicine, Hannover Medical School, Hannover, Germany. <sup>2</sup>Member of the German Center for Lung Research (DZL), Hannover, Germany. <sup>3</sup>GWT-TUD GmbH, Epidemiological Centre, Dresden, Germany. <sup>4</sup>Centre for Pulmonary Hypertension, Thoraxclinic Heidelberg GmbH at Heidelberg University Hospital, Heidelberg, Germany. <sup>5</sup>Lungenklinik, Löwenstein, Germany. <sup>6</sup>Institute of Biometry and Clinical Epidemiology, Charité-Universitätsmedizin, Berlin, Germany. <sup>7</sup>Institute for Clinical Pharmacology, Medical Faculty, Technical University, Dresden, Germany. <sup>8</sup>Dept of Cardiovascular and Respiratory Diseases, Sapienza, University of Rome, Rome, Italy. <sup>9</sup>Dept of Internal Medicine, Justus Liebig University Giessen, Universities of Giessen and Marburg Lung Center (UGMLC), Giessen, Germany. <sup>10</sup>Dept of Rheumatology, University Hospital, Zurich, Switzerland. <sup>11</sup>Dept of Cardiology, DRK Kliniken Berlin Westend, Berlin, Germany. <sup>12</sup>Dept of Cardiology, National Heart and Lung Institute, Imperial College London, London, UK. <sup>13</sup>Clinical Dept of Respiratory Diseases, University Hospitals of Leuven and Laboratory of Respiratory Diseases and Thoracic Surgery (BREATHE), Dept of Chronic Diseases and Metabolism (CHROMETA), KU Leuven – University of Leuven, Leuven, Belgium. <sup>14</sup>Dept of Medicine, Imperial College London, London, UK. <sup>15</sup>Clinic III for Internal Medicine (Cardiology) and Center for Molecular Medicine (CMMC), and the Cologne Cardiovascular Research Center (CCRC), University of Cologne, Cologne, Germany. <sup>16</sup>Dept of Respiratory Medicine, Ernst Moritz Arndt University Greifswald, Greifswald, Germany. <sup>17</sup>Deutsches Herzzentrum München, Klinik für Angeborene Herzfehler und Kinder Kardiologie, TU München, Munich, Germany. <sup>18</sup>Dept of Internal Medicine II, University Medical Center Regensburg, Regensburg, Germany. <sup>19</sup>Medizinische Klinik II, Gemeinnützige Krankenhausbetriebsgesellschaft Konstanz mbH, Konstanz, Germany. <sup>20</sup>Medizinische Klinik und Poliklinik II, Innere Medizin – Kardiologie/Pneumologie, Universitätsklinikum Bonn, Bonn, Germany. <sup>21</sup>VSIA Pauls Stradins Clinical University Hospital, Riga Stradins University, Riga, Latvia. <sup>22</sup>Fachabteilung Pneumologie, LungenClinic Grosshansdorf, Grosshansdorf, Germany. <sup>23</sup>Comprehensive Pneumology Center, Lungen Forschungsambulanz, Helmholtz Zentrum, Munich, Germany. <sup>24</sup>Dept of Medicine V, University Hospital, LMU Munich, Comprehensive Pneumology Center Munich (CPC-M), Munich, Germany. <sup>25</sup>Member of the German Center for Lung Research (DZL), Munich, Germany. <sup>26</sup>Medizinische Klinik und Poliklinik I, Universitätsklinikum Carl Gustav Carus der Technischen Universität Dresden, Dresden, Germany. <sup>27</sup>Klinik für Innere Medizin V, Pneumologie, Universitätsklinikum des Saarlandes, Homburg, Germany. <sup>28</sup>Medizinische Klinik und Poliklinik II, Abteilung für Pneumologie, Universitätsklinikum Leipzig, Leipzig, Germany. <sup>29</sup>Dept of Internal Medicine, Respiratory Medicine and Ventilatory Support, Medical Mission Hospital, Central Clinic Würzburg, Würzburg, Germany. <sup>30</sup>Clinic for General and Interventional Cardiology and Angiology, Herz- und Diabeteszentrum NRW, Ruhr-Universität Bochum, Bad Oeynhausen, Germany. <sup>31</sup>2nd Critical Care Dept, Attikon University Hospital, National and Kapodistrian University of Athens, Athens, Greece. <sup>32</sup>Dept of Pulmonary Medicine, Amsterdam Cardiovascular Sciences, Amsterdam UMC, Vrije Universiteit Amsterdam, Amsterdam, The Netherlands. <sup>33</sup>Clinic of Pulmonology, University and University Hospital of Zurich, Zurich, Switzerland. <sup>34</sup>Dept of Respiratory Medicine, Eppendorf University Hospital, Hamburg, Germany.

Corresponding author: Marius M. Hoeper ([hoeper.marius@mh-hannover.de](mailto:hoeper.marius@mh-hannover.de))

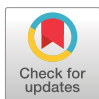

Shareable abstract (@ERSpublications)

**In this analysis of temporal trends in PAH treatment patterns and survival in 2010–2019, this study found an increase in the use of targeted combination therapies but only a slight, nonsignificant trend towards improved survival 3 years after diagnosis** <https://bit.ly/3FExlK5>

**Cite this article as:** Hoeper MM, Pausch C, Grünig E, *et al.* Temporal trends in pulmonary arterial hypertension: results from the COMPERA registry. *Eur Respir J* 2022; 59: 2102024 [DOI: 10.1183/13993003.02024-2021].

This single-page version can be shared freely online.

## Abstract

**Background** Since 2015, the European pulmonary hypertension guidelines recommend the use of combination therapy in most patients with pulmonary arterial hypertension (PAH). However, it is unclear

This version is distributed under the terms of the Creative Commons Attribution Non-Commercial Licence 4.0. For commercial reproduction rights and permissions contact [permissions@ersnet.org](mailto:permissions@ersnet.org)

This article has an editorial commentary:

<https://doi.org/10.1183/13993003.00390-2022>

Received: 21 July 2021

Accepted: 5 Oct 2021

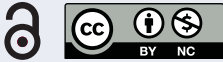

to what extent this treatment strategy is adopted in clinical practice and if it is associated with improved long-term survival.

**Methods** We analysed data from COMPERA, a large European pulmonary hypertension registry, to assess temporal trends in the use of combination therapy and survival of patients with newly diagnosed PAH between 2010 and 2019. For survival analyses, we looked at annualised data and at cumulated data comparing the periods 2010–2014 and 2015–2019.

**Results** A total of 2531 patients were included. The use of early combination therapy (within 3 months after diagnosis) increased from 10.0% in patients diagnosed with PAH in 2010 to 25.0% in patients diagnosed with PAH in 2019. The proportion of patients receiving combination therapy 1 year after diagnosis increased from 27.7% to 46.3%. When comparing the 2010–2014 and 2015–2019 periods, 1-year survival estimates were similar (89.0% (95% CI 87.2–90.9%) and 90.8% (95% CI 89.3–92.4%), respectively), whereas there was a slight but nonsignificant improvement in 3-year survival estimates (67.8% (95% CI 65.0–70.8%) and 70.5% (95% CI 67.8–73.4%), respectively).

**Conclusions** The use of combination therapy increased from 2010 to 2019, but most patients still received monotherapy. Survival rates at 1 year after diagnosis did not change over time. Future studies need to determine if the observed trend suggesting improved 3-year survival rates can be confirmed.
